# Supplementary material for: A stable, high relaxivity, diaqua gadolinium complex that suppresses anion and protein bindingElectronic supplementary information (ESI) available: pH dependence of europium emission spectra, stability screening details and relaxivity/pH plots for selected Gd complexes. See http://www.rsc.org/suppdata/cc/b1/b108294a/
Source: Royal Society of Chemistry journal article supplement (doi:10.1039/b108294a), 2001-12-06
Supplement: b108294a.pdf [file b108294a.pdf]

## Electronic Supplementary Information

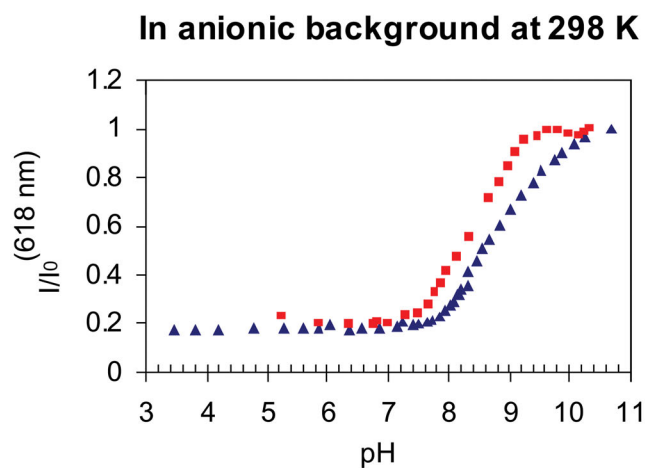

Anionic background:  
CO<sub>3</sub><sup>2-</sup>: 30mM,  
Cl<sup>-</sup>: 100mM,  
H<sub>2</sub>PO<sub>4</sub><sup>-</sup>: 0.9 mM  
lactate: 2.3 mM  
citrate: 0.13 mM  
(i.e. simulating an extracellular environment).

S1 Variation of emission intensity at 618nm for [EugDO3A]<sup>3-</sup> and [EuaDO3A]<sup>3-</sup> in the presence of a simulated extracellular anionic background (298K). The observed inflection above pH 7.5 corresponds to the onset of binding by carbonate, displacing the water molecules that quench the Eu excited state.

# Exchange lifetime $\tau_M$

Measurements of the transverse  $^{17}\text{O}$  relaxation time at variable temperature.

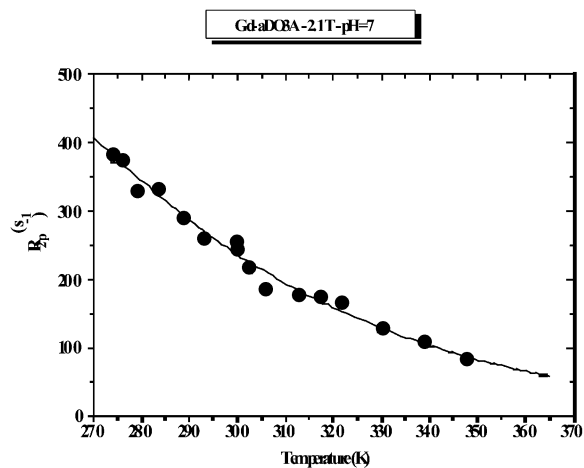

Fitting the curve to the Swift-Connick equations

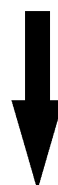

$$\tau_M = 30 \text{ ns (i.e. very fast)}$$

S2 Variation of the transverse  $^{17}\text{O}$  relaxation rate of water as a function of temperature, showing the (Swift-Connick) fit to the experimental data (2.1T, pH = 7).

### Relaxivity at 65 MHz Gd(III)aDO3A (293 K)

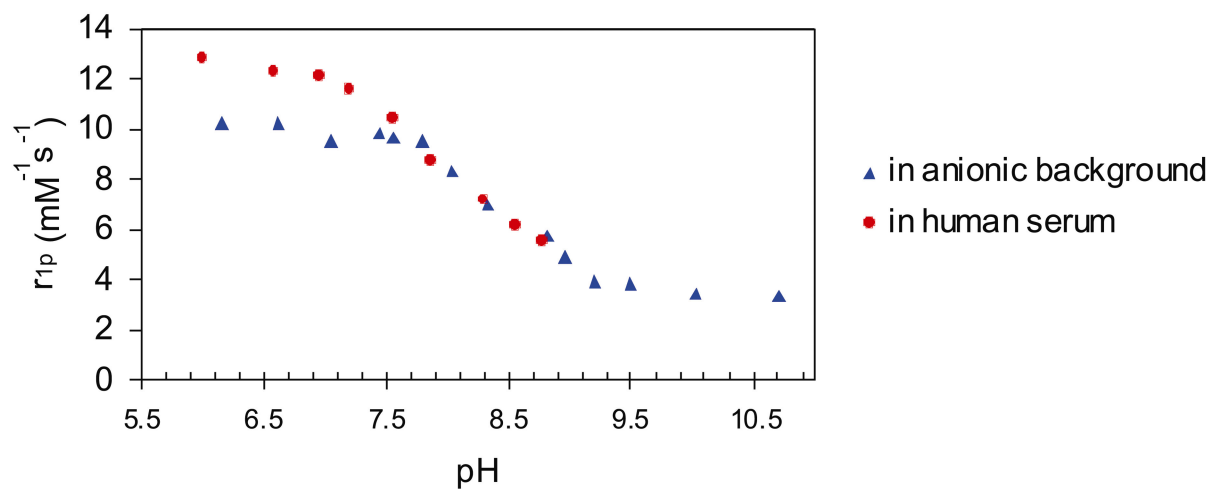

S3 Variation of the relaxivity of  $[\text{GdaDO3A}]^{3-}$  with pH (293K) in a simulated extracellular ionic background (triangles) and in human serum solution.

1 mM Gd complex  
 1 mM ZnCl<sub>2</sub>  
 pH = 7.0 in phosphate buffer ([KH<sub>2</sub>PO<sub>4</sub>] = 0.026 mol/L, [Na<sub>2</sub>HPO<sub>4</sub>] = 0.041 mol/L).

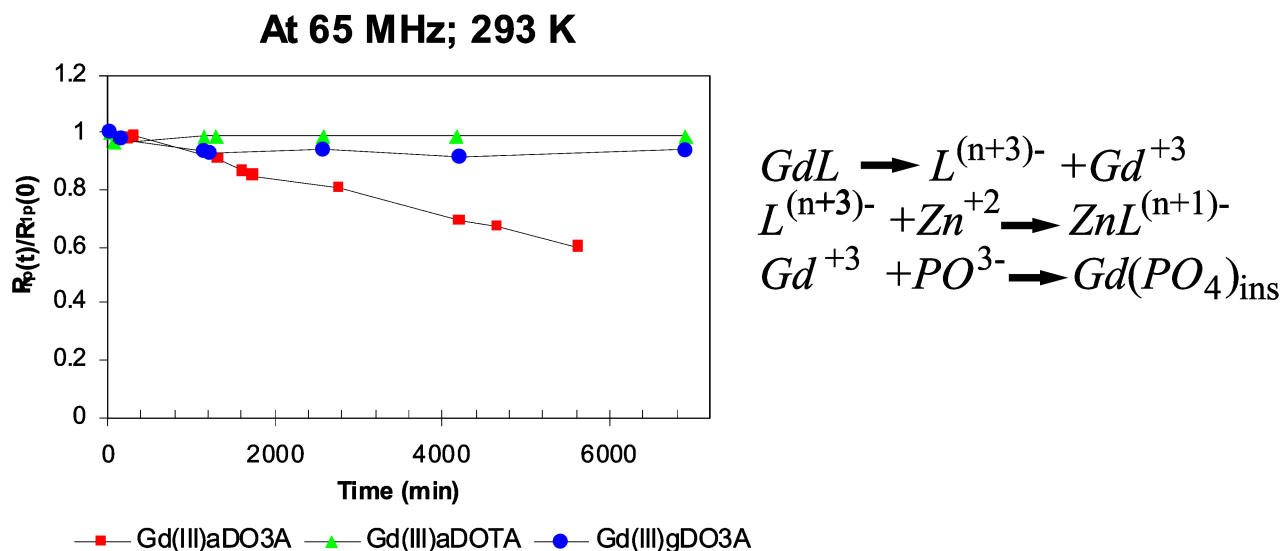

Laurent S. and co-worker *Investigative Radiology* **2001**, 36, 115.

### Thermodynamic (T.I.) and kinetic (K.I.) index

| Complex        | T.I.        | K.I.        |
|----------------|-------------|-------------|
| <b>GdaDO3A</b> | <b>0.69</b> | <b>2760</b> |
| GdgDO3A        | 0.95        | ∞           |
| GdaDOTA        | 0.99        | ∞           |
| GdDOTA         | 0.99        | ∞           |
| GdDTPA         | 0.49        | 260         |

**T.I.**  $R_{1p}(3days)/R_{1p}(0)$ ; **S.I.** Time for  $R_{1p}(t)/R_{1p}(0) = 0.80$

S4 and S-5 Empirical screen of complex stability by monitoring the change in the relaxivity of the stated Gd complexes as a function of time, following the methods of Laurent and Muller. Note the high kinetic and thermodynamic stability indices with respect to [GdDTPA]<sup>2-</sup>
